1 **TITLE**

2 R-loop mapping and characterization during Drosophila embryogenesis reveals

3 developmental plasticity in R-loop signatures

4

5 **Running title**

6 R-loop formation during Drosophila embryogenesis

7

8 **Authors**

9 Alexander Munden<sup>1</sup>, Mary Lauren Benton<sup>2</sup>, John A. Capra<sup>3</sup> and Jared Nordman<sup>1\*</sup>

10

11 **Affiliations**

12 <sup>1</sup> Department of Biological Sciences, Vanderbilt University, Nashville, TN, USA

13 <sup>2</sup> Department of Computer Science, Baylor University, Waco, TX, USA

14 <sup>3</sup> Bakar Computational Health Sciences Institute and Department of Epidemiology and

15 Biostatistics, University of California, San Francisco, CA, USA

16 \* Corresponding author: [jared.nordman@vanderbilt.edu](mailto:jared.nordman@vanderbilt.edu)

17

18 Keywords: Chromatin, epigenetics, RNA

19

20

21

22 **ABSTRACT**

23 R-loops are involved in transcriptional regulation, DNA and histone post-translational  
24 modifications, genome replication and genome stability. To what extent R-loop  
25 abundance and genome-wide localization is actively regulated during metazoan  
26 embryogenesis is unknown. *Drosophila* embryogenesis provides a powerful system to  
27 address these questions due to its well-characterized developmental program, the  
28 sudden onset of zygotic transcription and available genome-wide ChIP and transcription  
29 data sets. Here, we measure the overall abundance and genome localization of R-loops  
30 in early and late-stage embryos relative to *Drosophila* cultured cells. We demonstrate  
31 that absolute R-loop levels change during embryogenesis and that resolution of R-loops  
32 is critical for embryonic development. R-loop mapping by strand-specific DRIP-seq  
33 reveals that R-loop localization is plastic across development, both in the genes which  
34 form R-loops and where they localize relative to gene bodies. Importantly, these  
35 changes are not driven by changes in the transcriptional program. Negative GC skew  
36 and absolute changes in AT skew are associated with R-loop formation in *Drosophila*.  
37 Furthermore, we demonstrate that while some chromatin binding proteins and histone  
38 modification such as H3K27me3 are associated with R-loops throughout development,  
39 other chromatin factors associated with R-loops in a developmental specific manner.  
40 Our findings highlight the importance and developmental plasticity of R-loops during  
41 *Drosophila* embryogenesis.

42

43

44 **INTRODUCTION:**

45 R-loops are a three-stranded nucleic acid structure canonically formed when nascent  
46 RNA from transcription reanneals to the template DNA strand, resulting in a displaced  
47 single strand of DNA (Aguilera and García-Muse 2012). R-loops were initially identified  
48 at the highly transcribed *18S* and *28S* sequences within the rDNA locus of *Drosophila*  
49 *melanogaster* (White and Hogness 1977; Glover and Hogness 1977). More recent  
50 studies have demonstrated that R-loops are critical for a diverse set of biological  
51 processes (Chédin 2016; Skourtie-Stathaki and Proudfoot 2014). In fact, genome-wide  
52 R-loop mapping studies have revealed that R-loops are abundant in eukaryotes and can  
53 occupy 10% or more of the genome (Dumelie and Jaffrey 2018; Wahba and Koshland  
54 et al. 2016; Fang and Zhang et al. 2019; Xu and Sun et al. 2017; Yan and Liu et al.  
55 2020; Zeller and Gasser et al. 2016; Chen and Fu et al. 2017; Chen and Fazzio et al.  
56 2015; Crossley and Cimprich et al. 2020; Ginno and Chédin et al. 2012; Tan-Wong and  
57 Proudfoot et al. 2019; Chan and Hieter et al. 2014; Liu and Han et al. 2021). While R-  
58 loops were identified over 40 years ago, their physiological relevance remained elusive  
59 for many years.

60 R-loops are found in all domains of life and their formation is often conserved  
61 across cell types and even species (Sanz and Chédin et al. 2016). Deciphering the  
62 function of R-loops, however, has been challenging due to their diverse and sometimes  
63 contradictory roles in genome function. R-loops are essential for initiation of replication  
64 in plasmids and promote mitochondrial genome stability (Dasgupta and Tomizawa et al.  
65 1987; Silva and Aguilera et al. 2018). In contrast, R-loops can block replication fork  
66 progression and promote genome instability in an orientation-specific manner (Hamperl

67 and Cimprich et al. 2017; Lang and Merrih et al. 2017). While potentially causing  
68 double-strand breaks at head-on replication-transcription conflicts, R-loops can promote  
69 recombination and double strand break repair (Stork and Cimprich et al. 2016; Ouyang  
70 and Zou et al. 2021). R-loops also have diverse roles in transcription and chromatin  
71 function. In mammalian cells, R-loops have been shown to regulate both histone and  
72 DNA methylation at promoter regions (Ginno and Chédin et al. 2012; Chen and Fazio  
73 et al. 2015). While R-loops are often associated with histone modifications correlated  
74 with active transcription, recent work has shown that R-loops can help recruit the  
75 Polycomb complex to target loci to promote transcriptional silencing (Skourti-Stathaki  
76 and Pombo et al. 2019; Alecki and Francis et al. 2020). Genome-wide R-loop mapping  
77 studies in yeast, plants and mammalian cultured cells have identified factors such as  
78 DNA sequence, DNA topology and histone modifications associated with R-loop  
79 formation (Ginno and Chédin et al. 2012; Stolz and Chédin et al. 2019; Hage and  
80 Tollervey et al. 2010). R-loop mapping studies in plants and mammalian cells have  
81 further revealed that R-loop formation can be dynamic as a function of development  
82 (Fang and Zhang et al. 2019; Xu and Sun et al. 2020; Yan and Liu et al. 2020). The  
83 extent of R-loop plasticity in other metazoans has yet to be defined. Studying R-loops in  
84 the context of development could provide insight into the functional roles R-loops play in  
85 establishing developmental-specific changes in chromatin structure, function and  
86 transcriptional programs.

87 *Drosophila* provide a well-established developmental system to interrogate R-  
88 loop plasticity during development. At the earliest stages of *Drosophila* embryogenesis,  
89 rapid cell proliferation is driven by maternally stockpiled proteins and RNA (Tadros and

90 Lipshitz 2009). Approximately two hours after fertilization, zygotic genome activation is  
91 triggered and the transcription of over 3000 genes necessary for growth and  
92 differentiation are induced in a process known as the maternal-to-zygotic transition  
93 (MZT) (Hamm and Harrison 2018; Harrison and Eisen et al. 2011). Prior to the MZT,  
94 cells are largely undifferentiated and have abbreviated cell cycles (Foe and Alberts  
95 1983). After the MZT, however, the cell cycle slows and cells become differentiated as  
96 morphogenesis proceeds (Farrell and O'Farrell 2014). The changes in cell cycle  
97 programs, the onset of zygotic gene activation and cell differentiation during  
98 embryogenesis provide a unique system to interrogate whether R-loop formation or  
99 resolution impacts embryogenesis and the extent to which, if any, R-loop position and  
100 properties change as a function of development.

101         In this study, we measured R-loop abundance and position in *Drosophila*  
102 embryos and cultured cells. We show that absolute R-loop levels change during  
103 embryogenesis and resolution of R-loops is essential for embryogenesis. We mapped  
104 R-loops at base pair resolution in 2-3 hour embryos (immediately after the MZT), late-  
105 stage embryos (14-16 hours after fertilization) and cultured S2 cells, which are derived  
106 from late-stage embryos. We show that, while some sites of R-loop formation are  
107 constant during development, there is extensive R-loop plasticity during *Drosophila*  
108 development. Furthermore, we were able to demonstrate changes in the localization of  
109 R-loops across gene bodies and the role AT and GC skew play in *Drosophila* R-loop  
110 formation. By leveraging data available through modENCODE and other publicly  
111 available datasets, we were able to identify specific histone modifications and chromatin  
112 binding proteins associated with R-loop formation in *Drosophila* and the role active

113 transcription has on R-loop formation. Importantly, developmental-specific R-loops are  
114 not driven by transcriptional changes, emphasizing the role that chromatin and R-loop  
115 binding proteins play in regulating R-loop formation. Our work establishes *Drosophila* as  
116 a powerful developmental model system to study R-loop biology

117

## 118 **RESULTS:**

119 *R-loop abundance is developmentally regulated and R-loop homeostasis is necessary*  
120 *for development*

121 To determine if R-loop abundance and genomic location are regulated throughout  
122 development, we turned to the powerful *Drosophila* embryogenesis system. For our  
123 analysis, we chose embryos at two distinct time points: 2-3 hours after egg laying (AEL)  
124 and 14-16 hours AEL (Fig. 1A). The 2-3 hour time point corresponds with the onset of  
125 the maternal-to-zygotic transition (MZT) occurring during nuclear cleavage cycle 14  
126 (Blythe and Wieschaus 2015). This time point represents the onset of zygotic  
127 transcription and allows us to draw upon the wealth of scientific literature that has  
128 previously been published, including time-matched modENCODE datasets. The wide-  
129 scale activation of zygotic transcription at this time point should provide the first  
130 opportunity for R-loop formation during development. To complement this  
131 developmental stage, we chose 14-16 hour AEL embryos to understand how R-loop  
132 formation might differ in differentiated cells with a more mature chromatin environment  
133 and a transcription program characterized by cell-type-specific maintenance (Bonnet  
134 and Müller et al. 2019; Bowman and Bender 2014; Smith and Orr-Weaver 1991). S2  
135 cells, an established *Drosophila* cell culture line derived from late-stage embryos

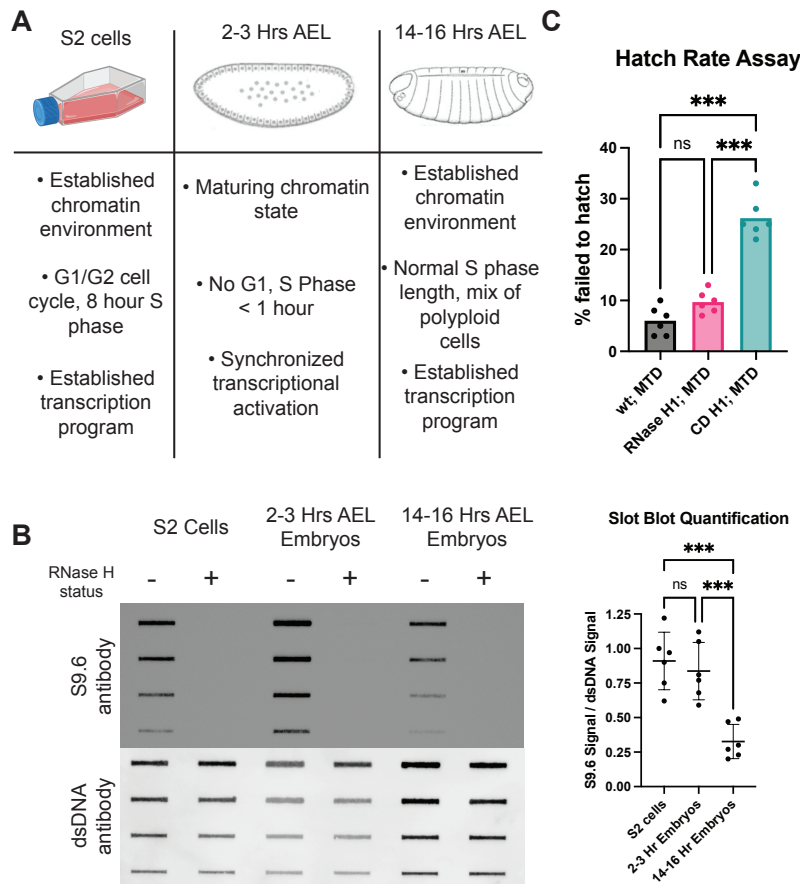

136

137 Figure 1: *R*-loop abundance is developmentally regulated and *R*-loop homeostasis is necessary for  
 138 development. (A) Schematic summarizing how the chromatin environment, developmental stage, and  
 139 replication program vary among the developmental samples used. (B) Representative slot blot of  
 140 RNA:DNA hybrid levels, measured by S9.6 antibody intensity, across samples. RNase H treatment  
 141 verifies specificity of antibody, and antibody specific for double-stranded DNA is used as a loading  
 142 control. Quantification of signal for six biological replicates is to the right. \*\*\* < 0.05, one-way ANOVA with  
 143 Tukey's multiple comparisons test. (C) Hatch rate among embryos that overexpress RNase H1 (H1) or a  
 144 catalytic dead RNase H1 (CD). \*\*\* < 0.05, one-way ANOVA with Tukey's multiple comparisons test.

145

146 (Schneider 1972), were used to determine how *R*-loops might differ between embryos  
 147 and cultured cells, where the majority of *R*-loop research has been conducted.

148 To begin, we asked whether the absolute levels of *R*-loops are influenced by  
 149 development. To this end, genomic DNA was extracted from each sample and spotted  
 150 onto a nitrocellulose membrane and probed with the S9.6 antibody, which recognizes

151 RNA:DNA hybrids (Boguslawski and Carrico 1986). S2 cells and 2-3h embryos showed  
152 similar amounts of S9.6 signal, while DNA from 14-16h embryos showed a significant  
153 decrease in S9.6 signal (Fig. 1B). To ensure that the S9.6 signal stems from R-loops,  
154 we pretreated control samples with RNase H, which degrades the RNA moiety of a  
155 RNA:DNA hybrid. The S9.6 antibody has some specificity to double-stranded RNA and  
156 *Drosophila* embryos are known to contain dsRNA (Hartono and Vanoosthuysse et al.  
157 2018). In fact, in the RNase H treated control samples we initially detected some signal  
158 with the S9.6 antibody, which was completely eliminated by pretreatment with RNase III.  
159 Therefore, for all R-loop assays we pretreat our samples with RNase III to ensure S9.6  
160 signal isn't due to dsRNA.

161       Next, we asked whether perturbing R-loop homeostasis affects embryogenesis.  
162 To answer this, we generated flies that overexpress a GFP-tagged, nuclear localized  
163 version of *Drosophila* RNase H1 or a catalytically dead version of the same protein  
164 (RNase H1<sup>CD</sup>). To ensure that the RNase H1 proteins were maternally deposited and  
165 present at the earliest stages of embryogenesis, we used the pUASz expression system  
166 coupled with the maternal triple driver (DeLuca and Spradling 2018; Rørth 1998). After  
167 confirming that the GFP was observable by western blot (Supplemental Fig. 1), we  
168 performed a hatch rate assay to determine if perturbing R-loop homeostasis affects  
169 embryogenesis. We observed a consistent but statistically insignificant hatching defect  
170 in the RNase H1 overexpression embryos (Fig. 1C). The RNase H1<sup>CD</sup> expressing  
171 embryos, however, had a ~25% failure to hatch rate, which was significantly different  
172 from the wild-type and the RNase H1 overexpression controls. Overall, we conclude  
173 that the absolute abundance of R-loops changes during development and that



174 preventing R-loop processing through overexpression of a catalytically dead RNase H1  
175 results in embryonic lethality.

176

177 *R-loop position and properties are influenced during development*

178 While the absolute abundance of R-loops changes during development, we wanted to  
179 determine how R-loop position throughout the genome changes during *Drosophila*  
180 development. Genome-wide R-loop mapping during *Drosophila* development would  
181 allow us to ask if R-loop formation is hardwired into the genome driven only by cell-type-  
182 specific transcription, or, more interestingly, is R-loop formation plastic during  
183 development changing independent of sequence composition and transcription status.  
184 To address this question, we performed DNA:RNA immunoprecipitation on sonicated  
185 nucleic acids followed by strand-specific sequencing of the DNA strand (ssDRIP-seq) in  
186 S2 cells, 2-3h and 14-16h embryos (Fig. 2A) (Xu and Sun 2017). We initially tried DNA-  
187 RNA immunoprecipitation followed by cDNA conversion coupled to high-throughput  
188 sequencing (DRIPc-seq) (Sanz and Chédin et al. 2016). When conducted in *Drosophila*,  
189 however, we found high levels of RNA contamination in the final sequencing results  
190 (data not shown). Even with the ssDRIP-seq method, it was necessary to pre-treat  
191 genomic DNA preps with RNase A and RNase III as *Drosophila* embryos are stockpiled  
192 with RNA.

193 ssDRIP-seq of embryos and S2 cells revealed strand-specific signal that was  
194 sensitive to RNase H pretreatment, and showed cell-type specific R-loop formation (Fig.  
195 2B and 2C). Biological replicates were highly correlated (Supplemental Fig. 2A) and our  
196 ssDRIP data sets were well correlated with recently published ssDRIP-seq data sets in

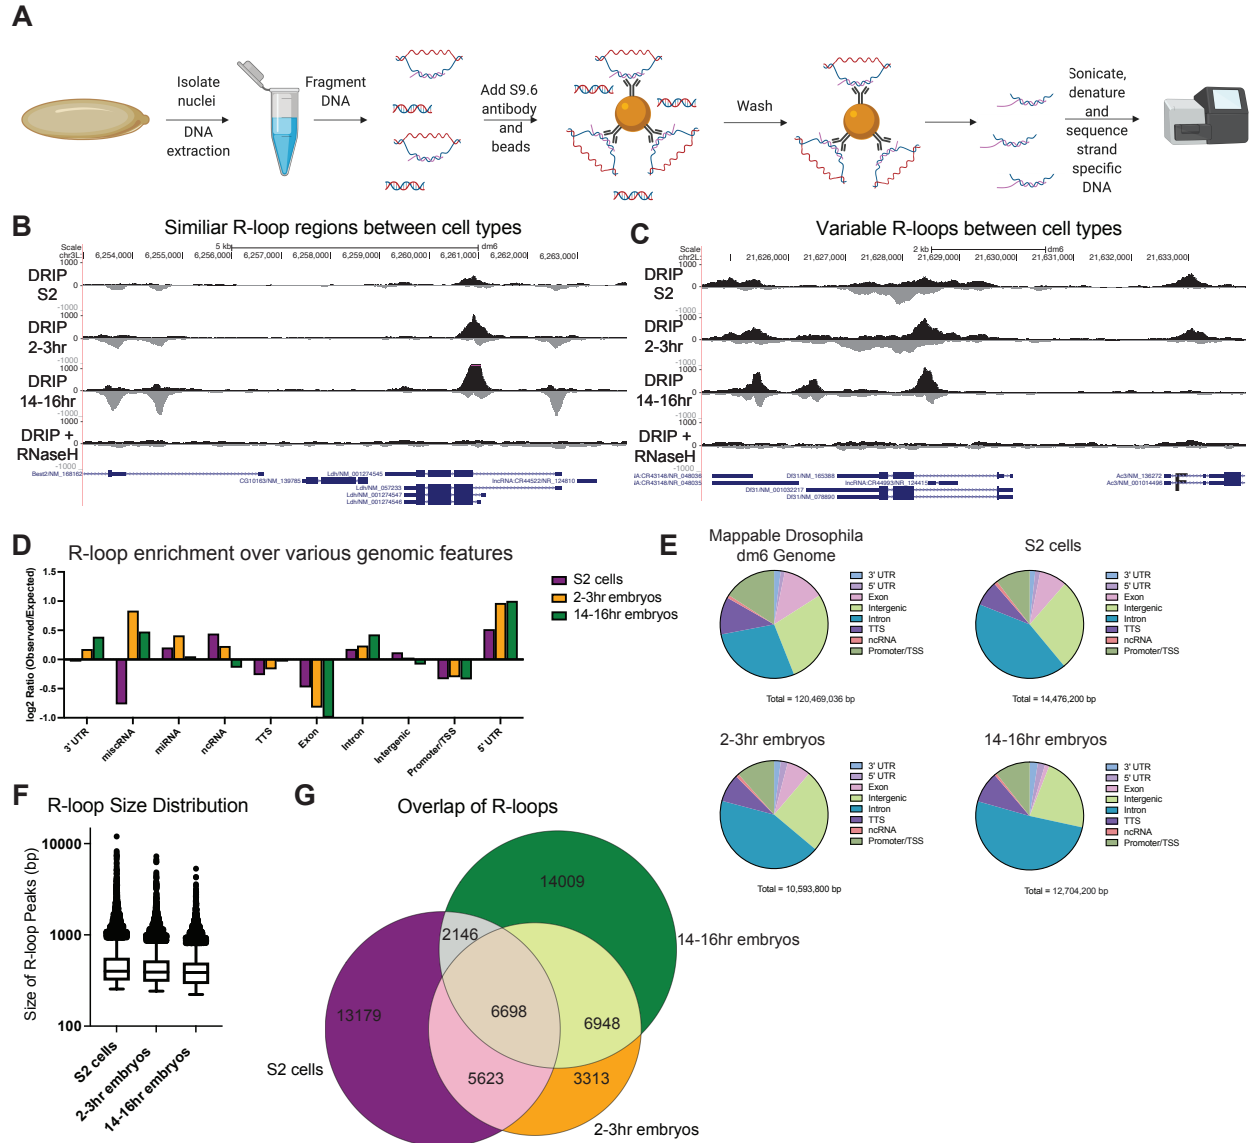

197

198 Figure 2: *The R-loop landscape changes as a function of development.* (A) Diagram of the ssDRIP-seq  
 199 mapping strategy. (B) ssDRIP-seq snapshot of a 10kb region on chromosome 3L where R-loop  
 200 distribution is similar between samples. (C) ssDRIP-seq snapshot of a 10kb region on chromosome 2L  
 201 where R-loop distribution varies between samples. (D) R-loop enrichment relative to the expected  
 202 distribution for common genomic features. (E) R-loop abundance within indicated genomic regions for  
 203 each developmental sample. (F) The distribution of R-loop sizes at different timepoints for each  
 204 developmental sample. (G) Overlap of R-loops between developmental samples.

205

206 Drosophila S2 cells and embryos, although different time points were used (2-3h and  
 207 14-16h vs. 2-6h and 10-14h embryos) (Alecki and Francis et al. 2020). We validated

208 several sites using DRIP-qPCR to confirm our sequencing results (Supplemental Fig.  
209 2B). These data indicate that our ssDRIP signal reflects RNA:DNA hybrid position  
210 throughout the genome and ssDRIP is a robust method to map sites of R-loop formation  
211 in *Drosophila*.

212 To map the precise location of R-loops throughout the genome and allow us to  
213 compare both quantitative and qualitative properties of R-loops, we used MACS to  
214 define R-loop peaks (Zhang and Lui et al. 2008). Peaks were called separately against  
215 the input samples and RNase H treated controls, and all overlapping peaks were kept  
216 for analysis. Using this criterion, we identified 28,464, 22,581 and 28,961 peaks in S2  
217 cells, 2-3h and 14-16h, respectively, which occupied between 8.3 and 12.5% of the  
218 genome. R-loop peak size was similar between sample types with a median of  
219 approximately 500 bp, but R-loops could occupy zones up to 10kb in size (Fig. 2F). Out  
220 of the 51,916 total unique R-loop peaks identified between all samples, 12.9% were  
221 common to all sample types, 28.3% were present in at least two samples and 58.8%  
222 were specific to an individual sample (Fig. 2G).

223 Since ssDRIP allows for strand-specific annotation, we characterized R-loops  
224 relative to strand-specific genomic features. Relative to transcription units,  
225 ~35% of R-loops occur in sense to transcription in S2 cells and 2-3h embryos, whereas  
226 ~30% of R-loops are antisense (Supplemental Fig. 2C). Interestingly, in the 14-16h  
227 embryos, a greater fraction of R-loops occurs antisense relative to transcription (~40%;  
228 Supplemental Fig. 2C). In all samples, 30-35% of the R-loops form in unannotated  
229 regions of the genome. Next, we used HOMER to annotate R-loop signal relative to  
230 genomic features (Heinz and Glass et al. 2010). In all samples, we found that R-loops

231 are enriched in the 5' UTR, introns and in miRNA regions, while R-loops are universally  
232 depleted in exonic regions (Fig. 2D-E). The depletion of R-loops in exons provides  
233 additional support that our R-loop peaks are not an artifact of RNA contamination (Fig.  
234 2D and 2E). Consistent with previous R-loop mapping studies, we identified strong R-  
235 loop signal at the rDNA locus and the histone gene locus (Supplemental Fig. 2D and  
236 2E) (Constantino and Koshland 2018; Dumelie and Jaffrey 2017). We also observed  
237 developmental-specific differences in R-loop formation. For example, R-loop signal was  
238 enriched in miRNA and ncRNA regions only in S2 cells and 2-3h embryos. Taken  
239 together, these results demonstrate that R-loop signal across *Drosophila* development  
240 is dynamic.

241

#### 242 *R-loop enrichment at transcription units changes during development*

243 In mammals, R-loops are known to preferentially form at transcription start sites (TSS),  
244 gene bodies and transcription termination sites (TTS) (Sanz and Chédin et al. 2016;  
245 Skourti-Stathaki and Proudfoot et al. 2014). To ask if this pattern of R-loop formation is  
246 similar in *Drosophila*, and whether it changes during development, we measured R-loop  
247 abundance across gene bodies in our developmental samples. S2 cells and 2-3h  
248 embryos display a very similar pattern of R-loop formation, with a strong peak at the  
249 TSS and continued signal over the gene body (Fig. 3A), which is similar to R-loop  
250 positions in other metazoans (Sanz and Chédin et al. 2016). Interestingly, there is a  
251 depletion of R-loops immediately after the TTS in S2 cells (Fig. 3A). The 14-16h  
252 embryos, however, have a significantly different pattern altogether, with R-loop  
253 enrichment at the TSS, lower signal over the gene body relative to S2 cells and 2-3h

254 embryos and a strong enrichment at the TTS (Fig. 3A). To determine if these patterns  
255 were driven by sense or antisense R-loops, we generated metaplots using strand-  
256 specific data. This analysis revealed that sense R-loops recapitulate this pattern, except  
257 with the 2-3h embryos having a more pronounced signal over the gene body. In  
258 general, antisense R-loops have a stronger signal at the TTS. In the 14-16h embryos,  
259 however, the majority of the signal at the TSS and TTS is derived from antisense R-  
260 loops (Fig. 3A). Taken together, we conclude that R-loop enrichment at transcription  
261 units is not hardwired into the genome, but can be dynamic as a function of  
262 development.

263         Given that the absolute levels and relative position of R-loops can change  
264 between developmental states in *Drosophila*, we wanted to assess the contribution DNA  
265 sequence composition has on R-loop formation in *Drosophila*. Unlike in mouse and  
266 human cells, *Drosophila* lack high GC content at the TSS. In fact, GC content  
267 decreases relative to the gene body in *Drosophila* (Fig. 3B). We asked if R-loop forming  
268 genes differ in their GC content relative to genes that lack R-loops. We found that genes  
269 with and without R-loops have a near-identical GC content along the gene body (Fig.  
270 3B). While overall GC content is not different in R-loop positive or negative genes, GC  
271 and AT skew has been shown to be a contributing factor to R-loop formation (Ginno and  
272 Chédin et al. 2012). To test if GC or AT skew is associated with R-loop formation in  
273 *Drosophila*, we measured the AT/GC skew directly over all identified R-loops. This  
274 analysis revealed a striking transition from positive to negative AT skew at the center of  
275 our combined R-loop signal. This is mirrored by a transition from negative to positive  
276 GC skew centered at the combined R-loop signal (Fig. 3C). Highlighting the robustness

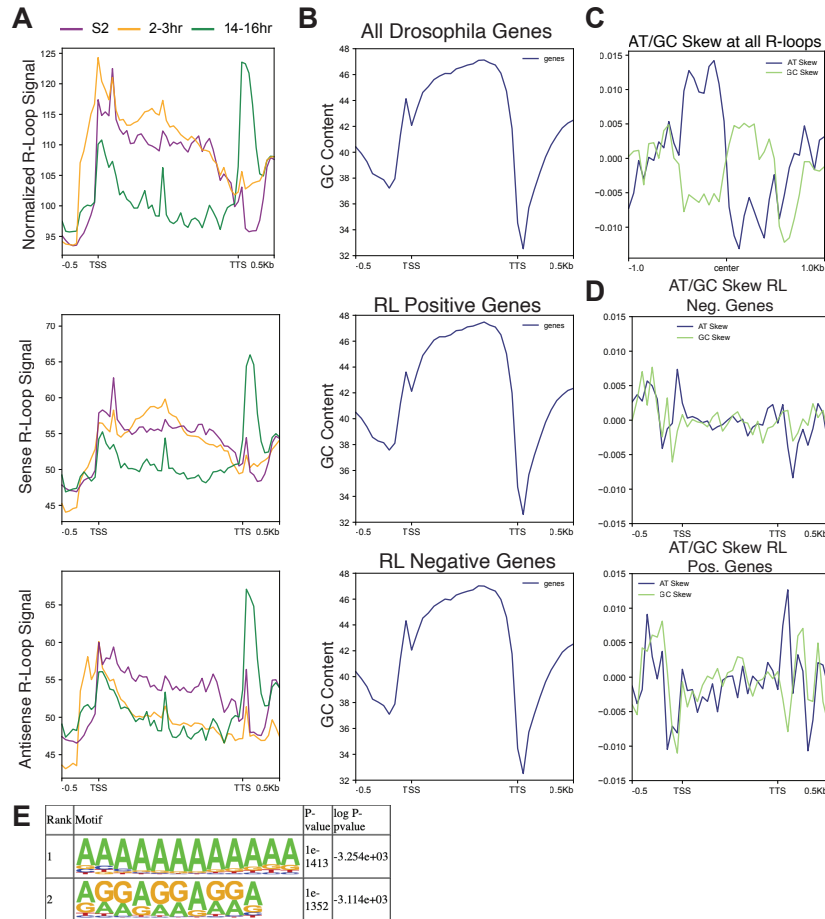

277

278 Figure 3: *R-loop signal as a function of transcription unit and sequence composition.* (A) Metaplot of  
 279 ssDRIP-seq signal for all samples relative to the gene body. Top panel is total R-loop signal, middle panel  
 280 is sense R-loops, bottom panel is anti-sense R-loops. (B) The GC composition of all Drosophila genes,  
 281 genes that have an R-loop in one of the developmental samples and genes that lack any R-loop signal.  
 282 (C) Metaplot of GC and AT skew across all identified R-loops. (D) Metaplot of GC and AT skew across  
 283 the gene body of genes that lack R-loops (top) and genes that form an R-loop. (E) DNA sequence motifs  
 284 in the peaks of all R-loops identified by HOMER.

285

286 of this transition in skew, even developmental-specific R-loops display the same  
 287 transition in AT/GC skew (Supplemental Fig. 3A).

288 We also calculated GC and AT skew for R-loop forming and deficient genes in all  
 289 samples. Stronger negative GC skew at the TSS and TTS were observed in R-loop  
 290 forming genes relative to genes that fail to form R-loops (Fig. 3D). Specifically, AT skew

291 at the TSS transitioned from positive skew in R-loop deficient genes to negatively skew  
292 in R-loop forming genes. At the TTS, there is a strong positive AT skew immediately  
293 downstream of the TTS only in R-loop forming genes (Fig. 3D). Negative GC skew is  
294 stronger in at both the TSS and TTS in R-loop forming genes. This analysis reveals a  
295 correlation between altered AT skew and negative GC skew in R-loop forming genes,  
296 suggesting that AT/GC skew could contribute to R-loop formation in *Drosophila*.  
297 Together, we conclude that while AT and GC skew could facilitate R-loop formation,  
298 developmental-specific R-loop formation is not likely driven by changes in AT or GC  
299 skew. This suggests that transcription, chromatin environment or other factors could  
300 contribute to cell type specific R-loop formation.

301 To test whether any specific DNA sequence motifs are associated with R-loop  
302 formation, we searched for motifs enriched in the set of all *Drosophila* R-loops. Two  
303 motifs stood out as an order of magnitude more significantly enriched than any others: a  
304 polyadenine tract and a polypurine tract (Fig. 3E, Supplemental Fig. 3B for the entire  
305 table). This indicates that polypurine tracts are conducive to R-loop formation, which is  
306 consistent with the known thermodynamic stability of RNA:DNA hybrid formation in  
307 purine-rich template sequences (Huppert 2008).

308

### 309 *Common and cell-type specific chromatin features associated with R-loops*

310 R-loops are associated with activating chromatin marks such as H3K4me1/2/3  
311 and H3K9ac and, to a lesser extent, with repressive chromatin marks such as  
312 H3K27me3 (Sanz and Chédin et al. 2016). Chromatin marks associated with R-loops,  
313 however, vary depending on species. One possibility is that there are marks that are

314 universally associated with R-loop formation whereas some chromatin marks could  
315 associate with R-loops in a developmental-specific manner. To answer this question, we  
316 leveraged time-matched ChIP-seq modENCODE datasets for S2 cells, 2-4h embryos  
317 (ChIP-chip and ChIP-seq) and 14-16h embryos. To quantitatively determine if chromatin  
318 marks were positively or negatively associated with R-loops, we evaluated the  
319 probability of R-loops overlapping a variety of histone modifications and chromatin-  
320 associated proteins by chance using a peak shuffling bootstrap procedure (see  
321 Materials and Methods). The available chromatin proteins vary for each sample, but  
322 there are 10 chromatin or histone markers common in all three developmental samples  
323 (Fig. 4A). Several factors that are associated with transcriptional activation, and have  
324 been previously shown to be associated with R-loops, are enriched at R-loops in S2  
325 cells and 2-3 hour embryos (Fig. 4A, Supplemental Fig. 4). Additionally, repressive  
326 chromatin marks such as Polycomb complex subunits and H3K27me3 are enriched in  
327 all samples, which is consistent with recent work linking R-loops to transcriptional  
328 repression (Fig. 4A, Supplemental Fig. 4) (Skourti-Stathaki and Pombo et al. 2019;  
329 Alecki and Francis et al. 2020).

330 We asked which marks are consistently associated with R-loops (positively or  
331 negatively) across development and which factors are developmental specific. We  
332 found that the repressive mark H3K27me3 was positively associated with R-loops in all  
333 developmental samples, highlighting the link between R-loops and transcriptional  
334 repression (Fig. 4B). Interestingly, we identified factors (H3K4me2 and ZW5) that were  
335 enriched in one developmental sample but not in others (Fig. 4B). These results  
336



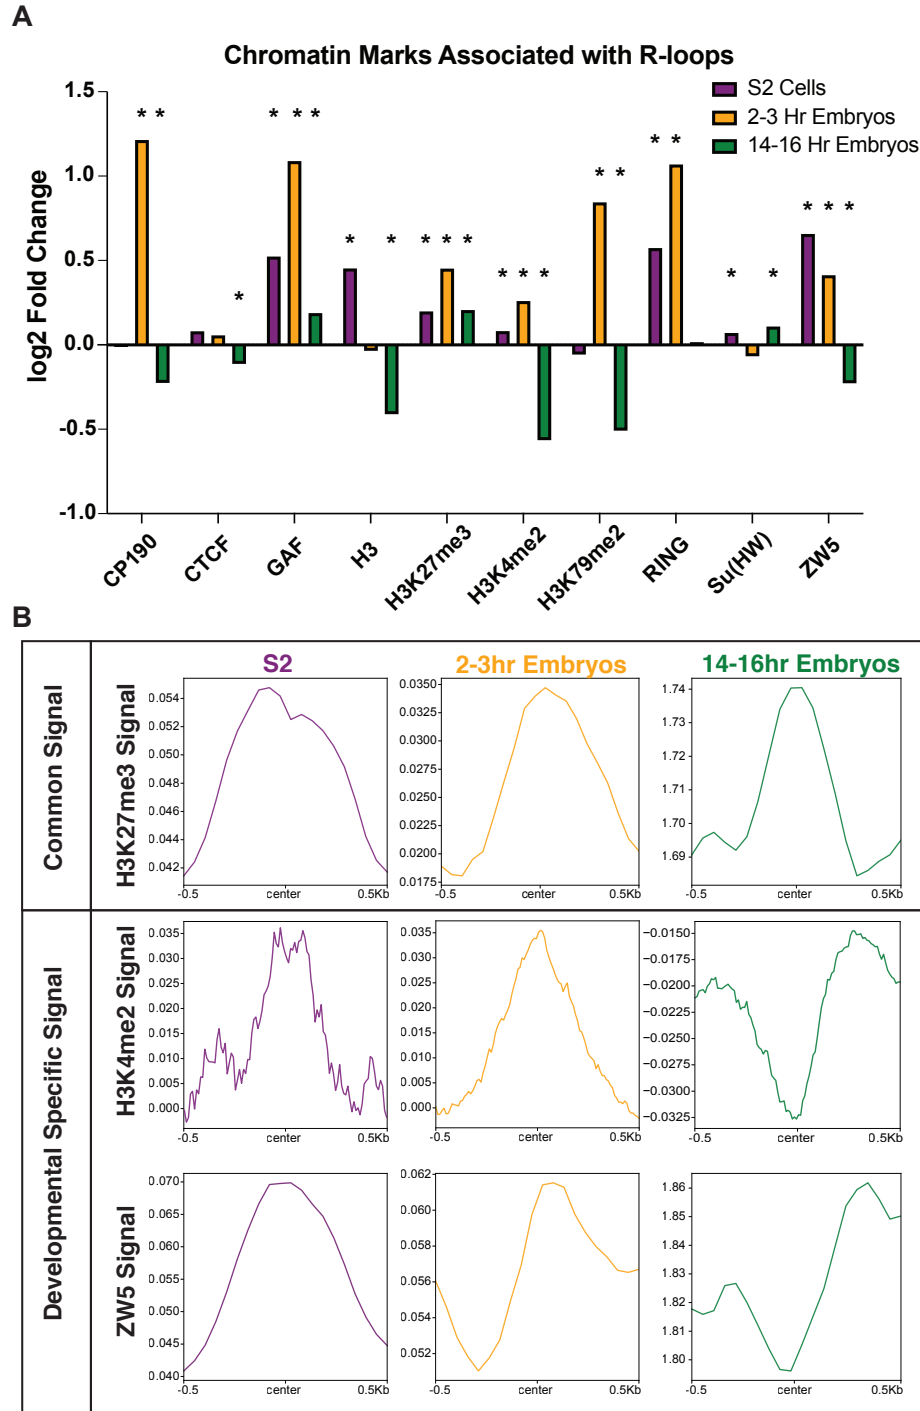

337  
 338 Figure 4: *Common chromatin features associated with R-loops.* (A) Log<sub>2</sub> fold enrichments of chromatin-  
 339 associated factors within R-loop regions in common for S2 cells, 2-3 hour embryos and 14-16 hour  
 340 embryos. \* < 0.05 with Bonferroni correction for multiple testing (B) Metaplots of H3K27me<sub>3</sub>, H3K4me<sub>2</sub>,  
 341 and ZW5 ChIP-chip (S2 and 2-4 hour embryos) and ChIP-seq (14-16 hour embryos) confirming common  
 342 and developmental-specific enrichment of chromatin factors at R-loops.  
 343

344 suggest while some factors are associated with R-loops regardless of development  
345 state, other factors are associated with R-loops in a developmentally-specific manner.

346

347 *R-loop formation as a function of transcription*

348 In this study, we have noted distinctive changes in R-loop formation across  
349 development. One possibility is that these changes are driven by developmental-  
350 specific changes in the transcription program. As embryos are stockpiled with  
351 maternally deposited RNA and RNA-seq is an indirect readout of active transcription,  
352 we turned to previously published and time-matched GRO-seq datasets in S2 cells and  
353 2-2.5h embryos, respectively (Core and Lis et al. 2012; Saunders and Ashe et al. 2013).  
354 Unfortunately, time-matched GRO or PRO-seq datasets do not exist for 14-16h  
355 embryos. We converted GRO-seq signal to FPKM for each annotated transcript in the  
356 *Drosophila* transcriptome. Then, we compared the GRO-seq value of all R-loop-  
357 containing genes to genes devoid of R-loops. In S2 cells, R-loop positive and negative  
358 genes had a similar median FPKM value by GRO-seq (Fig. 5A). R-loop-containing  
359 genes in 2-3h embryos, however, revealed a different paradigm. R-loop positive genes  
360 had a significantly higher expression level than R-loop negative genes (Fig. 5C).  
361 To ask if R-loop-containing genes were over or underrepresented with genes that have  
362 high or low expression levels, we binned GRO-seq FPKM values into quartiles and  
363 asked what fraction of R-loop containing genes fell within each expression quartile (Fig.  
364 5B, D). In S2 cells, R-loop containing genes were slightly overrepresented in the highest  
365 expression quartile and, to a lesser extent, in the lowest expression quartile (Fig. 5B). In  
366 2-3h embryos, however, R-loops were significantly overrepresented in the highest

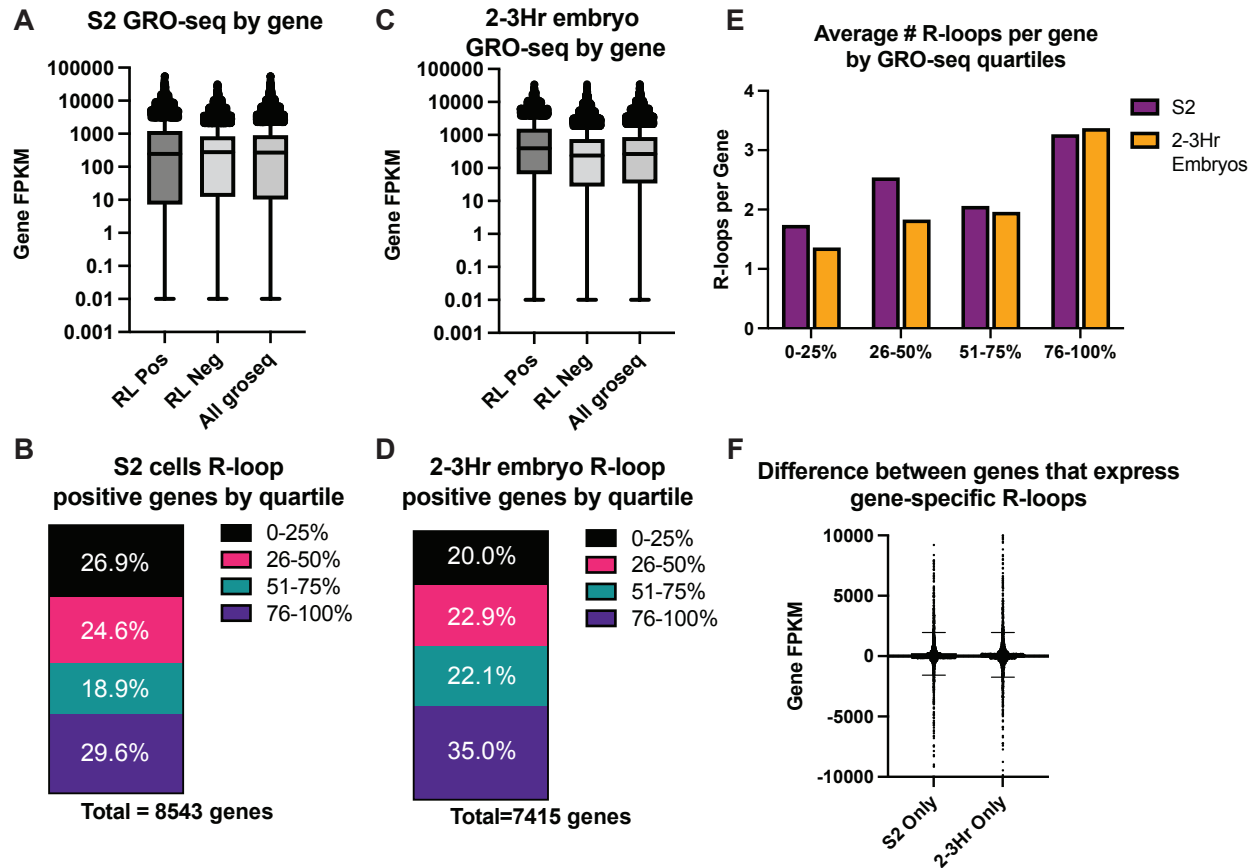

367

368 Figure 5: *R*-loop formation as a function of transcription. (A) GRO-seq values for genes that contain *R*-  
 369 loops (RL Pos) and genes that do not contain *R*-loops (RL Neg) in S2 cells. (B) Transcripts were sorted  
 370 into quartiles based upon GRO-seq expression, and *R*-loop forming genes were assigned to their  
 371 respective quartile. (C) Same as A, except for 2-3 hour embryos. (D) Same as B, except for 2-3 hour  
 372 embryos. (E) The average number of *R*-loops detected for each gene in each of the expression quartiles  
 373 is graphed for S2 cells and 2-3 hour embryos. (F) The difference in GRO-seq values between S2 cell and  
 374 2-3 hour embryos were queried for genes that showed developmental-specific *R*-loop formation.  
 375

376 expression quartile and underrepresented from the lowest expression quartile (Fig. 5D).

377 While analyzing this data, we also found the number of *R*-loops forming sites per gene

378 was correlated with transcriptional activity (Fig. 5E). We observe a consistent increase

379 in the average number of *R*-loops per gene as transcriptional activity increases (Fig.

380 5E). The increase in the average number of *R*-loops per gene could represent multiple

381 *R*-loops within a given gene or larger *R*-loop zones allowing *R*-loops to form over a

382 larger target region.

383           One explanation for developmental-specific R-loop formation is that specificity is  
384 driven by developmental-specific transcription status. To test this, we compared  
385 expression level of genes that exhibit R-loops only in S2 cell or only in 2-3h embryos  
386 (Fig. 5F). If active transcription drives the changes in R-loop formation, we would expect  
387 R-loop positive genes that are unique to 2-3h embryos would have significantly higher  
388 expression level in 2-3h embryos relative to S2 cells, and vice-versa. The median  
389 difference of GRO-seq values in developmental-specific R-loop-containing genes,  
390 however, is approximately zero with a normal distribution (Fig. 5F). Therefore, we  
391 conclude that active transcription is not a driver of developmental-specific R-loop  
392 formation and that factors such as chromatin state or R-loop-specific proteins drive  
393 these differences.

394

395 *R-loops have the potential to trigger ATR activation at the MZT*

396 The onset of zygotic transcription at the MZT is associated with RPA accumulation at  
397 the 5' end of genes and activation of the ATR-mediated DNA damage checkpoint  
398 response (Blythe and Wieschaus, 2015). Delaying the onset of zygotic transcription  
399 delays the activation of ATR (Mei41 in *Drosophila*), indicating that replication-  
400 transcription conflicts drive the activation of the DNA damage response that occurs at  
401 the MZT (Blythe and Wieschaus, 2015; Sibon and Theurkauf et al. 1999). It is unknown,  
402 instability at the MZT, we would predict to see an enrichment of RPA at R-loop forming  
403 sequences in 2-3h embryos. Qualitatively, we see overlap between RPA and R-loops in  
404 2-3h embryos (Fig. 6A). We tested the significance of this overlap by using the random  
405 shuffling method previously described. Quantitatively, we observe a significant

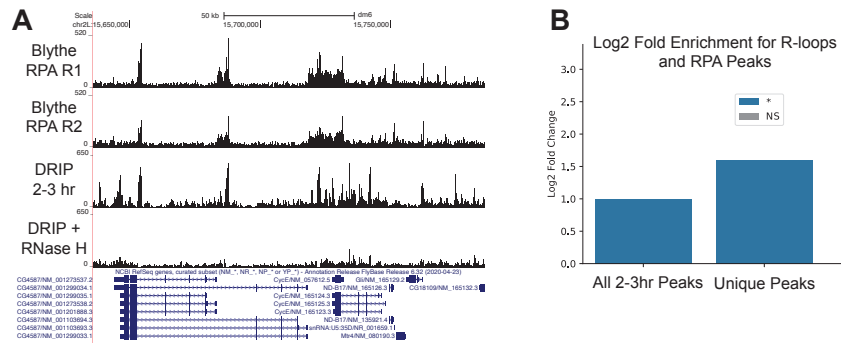

406

407 Figure 6: *R-loops have the potential to trigger ATR activation at the MZT.* (A) Overlap of RPA ChIP-seq  
408 profiles from cycle 13 embryos (Blythe and Wieschaus et al. 2015) and ssDRIP-seq profiles from 2-3h  
409 embryos. (B) Log<sub>2</sub>-fold enrichment of RPA at all 2-3h R-loop peaks or R-loops that are specific for 2-3h  
410 embryos.

411

412 enrichment of RPA at R-loop forming sequences in the 2-3h embryo. Importantly, there  
413 was an even more substantial enrichment of RPA at R-loop peaks that are unique to 2-  
414 3h embryos (Fig. 6B). This data suggests that R-loops could contribute to the  
415 transcription-induced DNA damage that occurs in the absence of ATR at the MZT. We  
416 do note, however, that the RPA ChIP-seq data comes from a time point ~20 minutes  
417 earlier in development than the time point we chose for R-loop mapping (Blythe and  
418 Wieschaus, 2015). Given this caveat, we think it is even more notable that significant  
419 overlap of RPA and R-loops is observed in this analysis.

420

## 421 **DISCUSSION:**

422 By mapping R-loops in a developing organism, we have been able to provide new  
423 insight into the role that DNA sequence, active transcription and chromatin associated  
424 factors has on R-loop formation. While previous analysis of R-loop metabolism across  
425 development has been performed in plants and mammalian cultured cells (Yan and Liu  
426 et al. 2020; Xiu and Sun et al. 2020; Shafiq and Sun et al. 2017), we present the first  
427 functional characterization of R-loops during *Drosophila* embryogenesis. A

428 developmental approach to studying R-loop formation is that it allows the distinction  
429 between factors that are stably linked to R-loop formation from those that are  
430 developmental specific. This has the potential to identify key molecules and processes  
431 that could drive R-loop formation and resolution during development and disease.

432         One surprising finding is that the absolute level of R-loops changes during  
433 embryogenesis. This is unlikely due to changes in transcription during development as  
434 the stages of embryogenesis used in this study are similarly active. This suggests that  
435 there is an active mechanism which prevents R-loop formation or resolves active R-  
436 loops during later stages of *Drosophila* embryogenesis. The importance of R-loop  
437 processing during development is further highlighted by the observation that preventing  
438 R-loop degradation by overexpression of a catalytically inactive version of RNase H1  
439 causes hatching defects in *Drosophila* embryos. Interestingly, overexpression of  
440 catalytically active RNaseH1 did not have the same effect. One possible explanation of  
441 this result is that hyper stable R-loops block replication, causing genome instability  
442 (Stork and Cimprich et al. 2016; Lang and Merrikh et al. 2017). Alternatively, hyper  
443 stable R-loops could drive chromatin or transcriptional changes that negatively impact  
444 embryogenesis (Lima and Crooke et al. 2016). Further work will be required to  
445 distinguish between these and other possibilities.

446         Specific DNA sequence biases are associated with R-loop formation (Ginno and  
447 Chédin et al. 2012; Stolz and Chédin et al. 2019). While we found that overall GC  
448 content is the same for R-loop positive and negative genes, AT and GC skew were  
449 associated with R-loop forming sequences. Interestingly, this skew varied as a function  
450 of the transcription unit. Promoter-associated R-loops have low AT and GC skew,

451 whereas R-loops in transcriptional termination regions have high AT skew, but low GC  
452 skew. This was unexpected given that G4 quadruplex forming regions with high GC  
453 skew on the non-template strand are associated with R-loop formation (Ginno and  
454 Chédin et al. 2012; Lee and Myong et al. 2020). Additionally, R-loops can modulate  
455 DNA methylation at CpG islands in promoter regions (Ginno and Chédin et al. 2012).  
456 Unlike in plants and mammals, however, *Drosophila* lack wide-scale DNA methylation  
457 (Capuano and Ralser et al. 2014). Therefore, *Drosophila* allows the uncoupling between  
458 R-loop formation and DNA methylation, which could explain why R-loops are associated  
459 with a higher AT skew than GC skew in *Drosophila*. Similar to other organisms,  
460 however, we have found several polypurine motifs associated with R-loops. This likely  
461 reflects the thermodynamic stability associated with RNA:DNA hybrids at purine-rich  
462 sequences (Huppert 2008). AT and GC skew can also vary as a function of a  
463 transcription unit, with promoter regions having higher GC skew than the gene body or  
464 termination region. One interesting observation in *Drosophila* is that the R-loop signal  
465 relative to the transcription unit can vary as a function of development. The most  
466 significant difference is in 14-16h embryos where R-loops are enriched at TTS, but not  
467 in 2-3h embryos or S2 cells. This difference does not appear to be driven by AT or GC  
468 skew. We propose that a combination of factors such as transcription status, chromatin  
469 marks and R-loop binding proteins drive these changes in R-loop formation during  
470 development.

471 We have found that R-loops are positively and negatively associated with specific  
472 histone modifications and chromatin associated factors. Many of the factors we  
473 analyzed in *Drosophila* have been shown to be enriched or depleted in other systems,

474 including mammalian cells (Sanz and Chédin et al. 2016; Pinter and Rathert et al. 2021;  
475 Herrera-Moyano and Aguilera et al. 2014). More importantly, however, factors  
476 associated with R-loops can change as a function of development. For example, R-  
477 loops in 14-16h embryos lose their association with common activating histone marks  
478 such as H3K4me3 and H3K36me2/3. In contrast, H3K27me3 is enriched at R-loops in  
479 all developmental states. Therefore, it is critical to assay multiple cell types or  
480 developmental states before concluding that a chromatin factor is correlated with R-loop  
481 formation.

482         The link between R-loops, transcription state, histone marks and chromatin  
483 associated factors has been seen in other organisms (Sanz and Chédin et al. 2016). In  
484 *Drosophila*, we see a consistent relationship between active and repressive chromatin  
485 marks, signified by enrichment in both H3K27ac and H3K27me3, and R-loop formation.  
486 This is supported by the association of R-loops with both highly active and silent genes  
487 in both embryos and cultured cells. Our work, and that of others, identify R-loops  
488 associated with transcriptionally active and inactive genes (Skourti-Stathaki and Pombo  
489 et al. 2019). This suggests that, at least in *Drosophila*, there may exist at least two  
490 classes of R-loops. R-loops that form as a byproduct of active transcription and R-loops  
491 that function in a repressive capacity to prevent transcription within repressive  
492 chromatin domains. This would be consistent with recent work demonstrating that R-  
493 loops facilitate silencing by the Polycomb complex (Alecki and Francis et al. 2020;  
494 Skourti-Stathaki and Pombo et al. 2019). Additionally, the abundance of R-loops in LTR  
495 and LINE elements in early embryos support the idea that R-loops prevent transcription  
496 of these elements (Zeller and Gasser et al. 2016; Bayona-Feliu and Azorín et al. 2017;



497 Zeng and Hamada et al. 2021). Understanding how different categories of R-loops  
498 maintain their identity will be an exciting challenge. For example, how do cells know  
499 which R-loops should function in a repressive manner versus those that function as  
500 activators? The question of whether R-loops help establish a chromatin state or are a  
501 function of it remains an outstanding question in R-loop biology.

502 Mapping of R-loops has been performed in a variety of organisms ranging from  
503 yeast, worms, plants, and mammalian cultured cells. While there are factors and  
504 processes that are consistently associated with R-loops across organisms, there are  
505 also key differences. For example, in plants there are low levels of R-loops at gene  
506 terminators compared to other organisms and high accumulation of antisense R-loops  
507 that regulate specific loci (Xu and Sun et al. 2020; Sun and Dean et al. 2013). In  
508 contrast, mammalian cells exhibit R-loops at promoters and TTS and the number of  
509 antisense R-loops are much more limited (Sanz and Chédin et al. 2016). The fact that  
510 *Drosophila* exhibit changes in antisense R-loop signal across the gene body depending  
511 on developmental state highlights the importance of examining R-loops in a  
512 developmental context. *Drosophila* provides a powerful model to understand key  
513 properties of R-loop biology in the context of unperturbed metazoan development. Here,  
514 we demonstrate that R-loop formation within the same genomic sequence can vary as a  
515 function of development. Our work suggests that a combination of transcription,  
516 chromatin-associated factors and sequence elements drive differential R-loop formation  
517 during development. Therefore, *Drosophila* provides a powerful model to understand,  
518 mechanistically, the factors responsible for R-loop formation and resolution to execute  
519 specific developmental programs.

520 **METHODS:**

521 *S9.6 antibody*

522 A hybridoma cell line producing the S9.6 antibody was purchased through ATCC  
523 (product #HB-8730). The cell line was grown under recommended conditions. The S9.6  
524 antibody was purified on a protein G column using the GE aKTA system and run over a  
525 desalting column for buffer exchange into PBS to obtain a final concentration of 1  
526 mg/mL. The antibody was aliquoted and stored at -80°C. A fresh aliquot was used for  
527 every ssDRIP-seq experiment.

528

529 *RNase H1 overexpression*

530 *Drosophila* RNase H1 was cloned from RNA derived from Oregon R embryos. RNA was  
531 converted into cDNA, PCR amplified, and cloned into the pUASz vector with a C-  
532 terminal GFP tag (DeLuca and Spradling 2018). The A isoform was chosen as the  
533 isoform B isn't detected in *Drosophila* tissues (Cózar de and Jøers et al. 2019). The  
534 mitochondrial localization start site was converted to AAA to ensure RNase H1-GFP  
535 would only be present in the nucleus. The catalytically dead version of RNase H1  
536 (D201N) was made by site-directed mutagenesis (Agilent QuickChange Lightning).  
537 Plasmids were injected into an *attP2* containing stock (BestGene) for site-specific  
538 integration.

539

540 *Hatch rate assay*

541 For the overexpression experiments, homozygous RNase H1 males were crossed with  
542 unmated female homozygous for the maternal triple driver (MTD, Bloomington Stock

543 31777) to drive expression early in embryogenesis. Male Oregon R flies were crossed  
544 with MTD females as a control. Progeny were transferred to bottles with a grape juice  
545 agar plate with wet yeast for embryo collection. 100 unhatched embryos were carefully  
546 moved to a fresh grape juice plate and incubated overnight at 25°C. After 36h,  
547 unhatched embryos were counted. This was repeated three times each from two  
548 separate crosses.

549

#### 550 Cell culture

551 S2 cells were obtained directly from the Drosophila Genomic Resource Center (DGRC).  
552 Cells were confirmed negative for mycoplasma contamination via PCR. Cells were  
553 grown at 25°C in Schneider's Drosophila Medium with 10% heat-inactivated FBS  
554 (Gemini Bio Products) and 100 U/mL of Penicillin/Streptomycin (Fisher Scientific).

555

#### 556 Embryo collection and staging

557 Oregon R flies were expanded into population cages containing grape juice plates  
558 supplemented with wet yeast. Population cages were kept at 25°C in a humidified room  
559 and plates were changed daily. Before embryo collections, flies were precleared for at  
560 least one hour to minimize the number of late-stage embryos. Embryos were collected  
561 and aged at 25°C to obtain embryos that were 2-3 or 14-16 hours old. After aging and  
562 collection, embryos were dechorionated in 50% bleach for 2 minutes and thoroughly  
563 rinsed in water. Embryos were flash frozen in liquid nitrogen and kept at -80°C until  
564 ready to use. An aliquot of embryos was taken from each batch before freezing to verify  
565 staging. For this, embryos were fixed in heptane and 2% paraformaldehyde for 20

566 minutes with shaking, devitellinized in methanol, washed with methanol and rehydrated  
567 in PBS + 0.1% Triton X-100 overnight. Embryos were stained with DAPI and mounted in  
568 Vectashield medium (Vector Labs). Images were acquired on a Nikon Ti-E inverted  
569 microscope with a Zyla sCMOS digital camera.

570

### 571 Genomic DNA purification and RNase treatment

572 Genomic DNA purification and DRIP protocols are based on Alecki and Francis et al.  
573 2020 and Xu and Sun et al. 2017. For genomic DNA isolation from S2 cells, cells were  
574 collected at 70-80% confluency, washed once in PBS, resuspended in TE with 0.5%  
575 SDS and 100 µg/mL proteinase K and incubated at 37°C overnight. Embryos were  
576 devitellinized in heptane and methanol, rinsed thoroughly in PBS and incubated in 50  
577 mM Tris-HCl pH 8.0, 100 mM EDTA, 100 mM NaCl, 0.5% SDS, and 5 mg/ml proteinase  
578 K for 3 hours at 50°C. At this point, cells and embryos were processed the same.  
579 Extracts were purified with phenol:chloroform, and DNA was precipitated with sodium  
580 acetate and ethanol. DNA was spooled using a glass pipette and transferred to 70%  
581 ethanol. After several washes in ethanol, the DNA was air dried and resuspended in TE.  
582 To degrade free RNA, samples were incubated with 100 µg of RNase A with 500mM  
583 NaCl for 1 hour at 37°C. RNase A was degraded by spiking in 100 µg/mL proteinase K  
584 and incubated for an additional 45 minutes. Samples were cleaned with  
585 phenol:chloroform, precipitated with sodium acetate and ethanol, and resuspended in  
586 TE. Samples were diluted to 100 ng/µL and sonicated in a Bioruptor Plus for 8 cycles  
587 (30" on/90" off) on low power. 10 µg of nucleic acid was digested with 5 µL RNase H  
588 (NEB) at 37°C for 16 hours and 10 µg was mock digested without RNase H. Both

589 samples had 1  $\mu$ L of RNase III added (Thermo Fisher). After phenol:chloroform  
590 purification and precipitation, samples were immediately used for DRIP or slot blot  
591 experiments.

592

### 593 Slot blot

594 Hybond Nylon membrane (Amersham) was pre-soaked in TE and a slot blot apparatus  
595 was assembled according to manufacturer's instructions (Bio-Rad). Samples with  
596 matching RNase H-digested controls were added to the blot, and nucleic acids were  
597 crosslinked to the membrane with a Strategene UV Stratalinker 1800 using the auto  
598 crosslink setting. Blots were blocked in milk, incubated with S9.6 (1:2,000) followed by  
599 mouse-HRP and imaged in a Bio-Rad Chemidoc MP. After imaging the R-loops, blots  
600 were stripped and re-probed using a dsDNA-specific antibody (Abcam ab27156) at  
601 1:20,000. Intensities were measured with ImageJ (Schneider and Eliceiri et al. 2012),  
602 and normalized intensity was obtained by dividing the S9.6 signal by the dsDNA signal  
603 (Ramirez and Grunseich et al. 2021). Each sample was the average of four technical  
604 replicates.

605

### 606 DRIP-qPCR and ssDRIP-seq

607 DRIP was carried out as described in Ginno and Chédin et al. 2012. Briefly, 4.4  $\mu$ g of  
608 DNA was resuspended in 500  $\mu$ L of TE. 10% was taken for the input sample. DRIP  
609 binding buffer was added to each sample (10mM sodium phosphate, 140mM NaCl,  
610 0.05% Triton X-100 final concentration) and 20  $\mu$ L of 1 mg/mL S9.6 was added to each  
611 DRIP reaction. After overnight incubation at 4°C, 50  $\mu$ L of pre-washed protein G

612 Dynabeads (Life Technologies) were added to the extract. After 2 hours at 4°C, beads  
613 with captured nucleic acid were washed in 1x DRIP binding buffer 5 times and eluted in  
614 50mM Tris, 10mM EDTA, 0.5% SDS with proteinase K at 50°C for 45 minutes. Nucleic  
615 acid in the eluate was purified with phenol:chloroform, precipitated and resuspended in  
616 10mM Tris. For DRIP-qPCR, samples were diluted 1:10 in water and mixed with iTaq  
617 (Bio-Rad), with analysis carried out on a Bio-Rad CFX96 Touch instrument. For  
618 ssDRIP, nucleic acid was sonicated in a Bioruptor Plus for 8 cycles at high power (30“  
619 on/30” off) to 250 bp. Libraries were constructed with the Accel-NGS 1S Plus DNA  
620 Library Kit according to the manufacturer’s instruction (Swift Biosciences 10024).  
621 Barcoded libraries were sequenced using an Illumina Novaseq for 150bp PE reads.

622

## 623 Bioinformatics

### 624 Alignment and peak calling

625 Fastq files were initially trimmed of adapters using Trimmomatic v0.3.8 (Bolger and  
626 Usadel et al. 2014). Each paired read was trimmed 10 base-pairs at the 3’ end to  
627 eliminate the additional low complexity from the library preparation kit. Reads for  
628 sequencing were mapped to the Drosophila genome (dm6) using bowtie2 version  
629 2.3.4.1 using the –very-sensitive-local setting (Langmead and Salzberg 2012).  
630 Duplicates were marked using picard MarkDuplicates v2.17.10, and stranded bam files  
631 were created using samtools as described in Xu and Sun et al. 2017 (Li and Durbin et  
632 al. 2009). Stranded bam files were used to generate ssDRIP peaks with callpeaks from  
633 MAC2 v2.1.2 (Zhang and Liu et al. 2008). The RNase H pretreated DRIP file was used  
634 as control, peak calling was done in paired-end mode, with –keep-dup=auto and

635 effective genome size for *Drosophila dm6*. Stranded reads were visualized using  
636 `deeptools bamCoverage` using `--binSize 50bp, --ignoreForNormalization chrY chrM,` and  
637 `--normalizeUsing RPKM` (Ramírez and Manke et al. 2014). A small number of reads  
638 mapped to both strands. These reads were discarded for the analysis.

639

#### 640 *ssDRIP-seq analysis*

641 Annotation of R-loop peaks was done with HOMER software package using  
642 `annotatePeaks.pl` (Heinz and Glass 2010). Stranded R-loops were determined via  
643 `bedtools intersect with strandedness` against the Refseq *Drosophila* transcriptome,  
644 downloaded from UCSC genome browser. Metagene plots were made with the  
645 `Deeptools` software package, using `computeMatrix` and `plotProfile`. GRO-seq FPKM  
646 counts were determined with HOMER `analyzeRepeats.pl` using S2 datasets from Core  
647 and Lis et al. 2012 and GRO-seq data on 2-2.5 embryos from Saunders and Ashe et al.  
648 2013.

649

#### 650 *Functional genomic data from modENCODE*

651 We downloaded histone modification peaks and transcription factor binding sites  
652 identified by ChIP-chip or ChIP-seq in *Drosophila* from ModENCODE (Contrino and Hu  
653 et al. 2012). We considered samples assayed in S2 cells and at two developmental  
654 timepoints (2-4hr, 14-16hr). These were chosen to match the ssDRIP timepoints.

655

656 **Table 1** List of available ChIP-chip and ChIP-seq from modENCODE.

---

| Assay | Time | Mark |
|-------|------|------|
|-------|------|------|

---

|               |             |                                                                                                                                                                                                                                                                                                                                                                                                                                                                                                                                                                                                                                |
|---------------|-------------|--------------------------------------------------------------------------------------------------------------------------------------------------------------------------------------------------------------------------------------------------------------------------------------------------------------------------------------------------------------------------------------------------------------------------------------------------------------------------------------------------------------------------------------------------------------------------------------------------------------------------------|
|               |             | BEAF-32, CP-190, CTCF, RING, SFMBT, GAF, H2Av, H2Bubi, H3, H3K18ac, H3K23ac H3K27ac, H3K27me3, H3K36me1, H3K36me3, H3K4me1, H3K4me2, H3K4me3, H3K79me1, H3K79me2, H3K79me3, H3K9ac, H3K9me2, H3K9me3, H4, H4K20me1, HP1a, HP1c, HP2, Polycomb, POF, Su(HW), ZW5                                                                                                                                                                                                                                                                                                                                                                |
| ChIP-<br>chip | 2-4 hr      | ACF1, ASH1, BEAF-70, BEAF-HB, CG10630, Chriz-WR, CP190, CTCF, Mi-2, Topoll, RING, SFMBT, E(z), GAF, H1, H2Av, H2BK5ac, H2Bubi, H3, H3K18ac, H3K23ac, H3K27ac, H3K27me1, H3K27me2, H3K27me3, H3K36me1, H3K36me3, H3K4me1, H3K4me2, H3K4me3, H3K79me1, H3K79me2, H3K79me3, H3K9ac, H3K9acS10P, H3K9me1, H3K9me2, H3K9me3, H4, H4acTetra, H4K12ac, H4K16ac, H4K20me1, H4K5ac, H4K8ac, HP1a, HP1b, HP1c, HP2, HP4, ISWI, JHDML, JIL-2, JMJD2A, LSD1, MBD-R2, MLE, mod(mdg4), MOF, MRG15, MSL-1, NURF301, ORC2, Polycomb, PCL, Pho, Pof, PR-Set7, Psc, Rhino, RNAPoIII, RPD3, Smc3, Spt16, Su(HW), Su(var)3-7, Su(var)3-9, WDS, ZW5 |
| ChIP-<br>seq  | 14-16<br>hr | Beaf-HB, Chriz, CP190, CTCF, Mi-2, RING, GAF, H1, H2Av, H2B-ubi, H3, H3K18ac, H3K23ac, H3K27ac, H3K27me2, H3K27me3, H3K36me1, H3K36me2, H3K36me3, H3K4me1, H3K4me3, H3K79me1, H3K79me2, H3K79me3, H3K9acS10P, H3K9me1, H3K9me2, H3K9me3, H4, H4K16ac, H4K20me1,                                                                                                                                                                                                                                                                                                                                                                |



---

HP1a, HP1b, HP1c, HP2, HP4, JHDMI, LSD1, MBD-R2, MOF,  
NURF301, POF, Psc, RNAPoIII, RPD3, Su(HW), Su(var)3-7,  
ZW5

---

657

658 *Chromatin marker enrichment in R-loops*

659 For each CHIP-chip or CHIP-seq marker with a matching DRIP timepoint, we calculated  
660 the number of overlapping base-pairs (bp) between the marker and the R-loop peaks.  
661 We used permutation-based approach to determine whether the observed amount of  
662 overlap was more or less than expected by chance. Briefly, we calculated an empirical  $p$   
663 value for the observed amount of overlap by comparing the number of overlapping bp to  
664 a null distribution. We obtained the null distribution by randomly shuffling length-  
665 matched regions throughout the genome and calculating the amount of overlap in each  
666 permutation. The  $p$ -values are adjusted for multiple testing using the Bonferroni method.

667 When permuting, we matched the length distribution of the shuffled peaks to the  
668 original set of peaks, and excluded all gap and blacklisted regions from consideration  
669 (dm3; version 1) (Amemiya and Boyle et al. 2019). Peaks called from DRIP were lifted  
670 over to dm3 for this analysis. For peaks obtained from CHIP-chip data, we required that  
671 the shuffled peaks maintained both the overall length distribution and the probe density  
672 of the original peak. We reshuffled any peaks that fell more than 2 standard deviations  
673 (approx. 0.03) away from the original probe density until at least 99% of the original  
674 peaks were appropriately matched. We performed 1000 permutations for each marker  
675 and R-loop pair.

676 For the general analyses, we maintained the location of the R-loop peaks and  
677 shuffled the locations of the histone modification or transcription factor binding peaks.  
678 For a secondary analysis, we examined a subset of R-loops quantified specifically in the  
679 TTS and 3' UTR. For this set of R-loops, we maintained the R-loop location within the  
680 TTS/3' UTR and shuffled the chromatin markers.

681

### 682 Calculation of GC-skew in R-loops

683 We calculated GC skew over three sets of genomic regions: (1) all of the ascertained R-  
684 loops, (2) all genes that do not overlap R-loops, and (3) all genes that overlap R-loops.  
685 We used the bedTools suite to obtain sequences for each of these genomic regions  
686 before calculating skew (Quinlan and Hall 2010). GC skew was calculated for 50 bp  
687 windows tiled across the annotation regions as  $S_i = \frac{(G_i - C_i)}{G_i + C_i}$  (McLean and Devine et al.  
688 1998).

689 In the equation,  $G_i$  represents the frequency of guanine nucleotides and  $C_i$   
690 represents the frequency of cytosine nucleotides in the window  $i$ . The range of GC skew  
691 for a window ( $S_i$ ) spans from -1 to 1. The resulting GC skew across each set of genomic  
692 regions was plotted using deepTools.

693

### 694 **DATA ACCESS:**

695 Data sets generated in this study can be found under the GEO accession number:  
696 GSE185403.

697

### 698 **COMPETING INTEREST STATEMENT**

699 The authors declare no competing interests

700

701 **ACKNOWLEDGEMENTS:**

702 We thank the Vanderbilt VANTAGE core for Illumina sequencing and the Vanderbilt  
703 Antibody and Protein Resource core for purifying the S9.6 antibody. The Vanderbilt  
704 Antibody and Protein Resource core is supported by the Vanderbilt Institute of Chemical  
705 Biology and the Vanderbilt Ingram Cancer Center (P30 CA68485). We thank Martina  
706 Brienza-Ramos for cloning of the RNase H1 plasmids used for fly injections. We thank  
707 Emily Hodges, Robin Armstrong and Frederic Chédin for providing critical feedback on  
708 the manuscript. We thank Lionel Sanz, Célia Alecki and Nicole Francis for technical  
709 advice. This work was supported by National Institutes of Health (NIH) General Medical  
710 Sciences awards R35GM127087 to JAC and R35GM128650 to JTN.

711

712 **AUTHOR CONTRIBUTIONS:**

713 AM and JTN planned and designed the research; AM performed experiments; AM and  
714 MB analyzed data with supervision from JAC; AM and JTN wrote the manuscript. AM,  
715 MB, JAC and JTN edited the manuscript.

716

717 **REFERENCES:**

718 Aguilera A, García-Muse T. 2012. R Loops: From Transcription Byproducts to Threats  
719 to Genome Stability. *Molecular Cell* 46: 115–124.

720 Alecki C, Chiwara V, Sanz LA, Grau D, Pérez OA, Boulier EL, Armache K-J, Chédin F,  
721 Francis NJ. 2020. RNA-DNA strand exchange by the Drosophila Polycomb complex  
722 PRC2. *Nat Commun* 11: 1781.

723 Amemiya HM, Kundaje A, Boyle AP. 2019. The ENCODE Blacklist: Identification of  
724 Problematic Regions of the Genome. *Sci Rep-uk* 9: 9354.

725 Bayona-Feliu A, Casas-Lamesa A, Reina O, Bernués J, Azorín F. 2017. Linker histone  
726 H1 prevents R-loop accumulation and genome instability in heterochromatin. *Nat*  
727 *Commun* 8: 283.

728 Blythe SA, Wieschaus EF. 2015. *Chapter Four Coordinating Cell Cycle Remodeling*  
729 *with Transcriptional Activation at the Drosophila MBT*. 1st ed. Elsevier Inc.

730 Blythe SA, Wieschaus EF. 2015. Zygotic Genome Activation Triggers the DNA  
731 Replication Checkpoint at the Midblastula Transition. *Cell* **160**: 1169–1181.

732 Boguslawski SJ, Smith DE, Michalak MA, Mickelson KE, Yehle CO, Patterson WL,  
733 Carrico RJ. 2002. Characterization of monoclonal antibody to DNA · RNA and its  
734 application to immunodetection of hybrids. *Journal of Immunological Methods* 89: 123–  
735 130.

736 Bolger AM, Lohse M, Usadel B. 2014. Trimmomatic: a flexible trimmer for Illumina  
737 sequence data. *Bioinformatics* 30: 2114–2120.

738 Bonnet J, Lindeboom RGH, Pokrovsky D, Stricker G, Çelik MH, Rupp RAW, Gagneur J,  
739 Vermeulen M, Imhof A, Müller J. 2019. Quantification of Proteins and Histone Marks in  
740 Drosophila Embryos Reveals Stoichiometric Relationships Impacting Chromatin  
741 Regulation. *Dev Cell* **51**: 632–644.e6.

742 Bonnet J, Lindeboom RGH, Pokrovsky D, Stricker G, Çelik MH, Rupp RAW, Gagneur J,  
743 Vermeulen M, Imhof A, Müller J. 2019. Quantification of Proteins and Histone Marks in  
744 *Drosophila* Embryos Reveals Stoichiometric Relationships Impacting Chromatin  
745 Regulation. *Dev Cell* **51**: 632-644.e6.

746 Capuano F, Mülleder M, Kok R, Blom HJ, Ralser M. 2014. Cytosine DNA Methylation Is  
747 Found in *Drosophila melanogaster* but Absent in *Saccharomyces cerevisiae*,  
748 *Schizosaccharomyces pombe*, and Other Yeast Species. *Anal Chem* **86**: 3697–3702.

749 Chan YA, Aristizabal MJ, Lu PYT, Luo Z, Hamza A, Kobor MS, Stirling PC, Hieter P.  
750 2014. Genome-Wide Profiling of Yeast DNA:RNA Hybrid Prone Sites with DRIP-Chip.  
751 *Plos Genet* **10**: e1004288.

752 Chédin F. 2016. Nascent Connections: R-Loops and Chromatin Patterning. *Trends*  
753 *Genet* **32**: 828–838.

754 Chen L, Chen J-Y, Zhang X, Gu Y, Xiao R, Shao C, Tang P, Qian H, Luo D, Li H, et al.  
755 2017. R-ChIP Using Inactive RNase H Reveals Dynamic Coupling of R-loops with  
756 Transcriptional Pausing at Gene Promoters. *Mol Cell* **68**: 745-757.e5.

757 Chen PB, Chen HV, Acharya D, Rando OJ, Fazzio TG. 2015. R loops regulate  
758 promoter-proximal chromatin architecture and cellular differentiation. *Nat Struct Mol Biol*  
759 **22**: 999–1007.

760 Contrino S, Smith RN, Butano D, Carr A, Hu F, Lyne R, Rutherford K, Kalderimis A,  
761 Sullivan J, Carbon S, et al. 2012. modMine: flexible access to modENCODE data.  
762 *Nucleic Acids Res* **40**: D1082–D1088.

763 Core LJ, Waterfall JJ, Gilchrist DA, Fargo DC, Kwak H, Adelman K, Lis JT. 2012.  
764 Defining the Status of RNA Polymerase at Promoters. *Cell Reports* **2**: 1025–1035.

765 Costantino L, Koshland D. 2018. Genome-wide Map of R-Loop-Induced Damage  
766 Reveals How a Subset of R-Loops Contributes to Genomic Instability. *Molecular Cell*  
767 **71**: 1–34.

768 Cózar JMG de, Gerards M, Teeri E, George J, Dufour E, Jacobs HT, Jöers P. 2019.  
769 RNase H1 promotes replication fork progression through oppositely transcribed regions  
770 of *Drosophila* mitochondrial DNA. *J Biol Chem* 294: jbc.RA118.007015.

771 Crossley MP, Bocek MJ, Hamperl S, Swigut T, Cimprich KA. 2020. qDRIP: a method to  
772 quantitatively assess RNA–DNA hybrid formation genome-wide. *Nucleic Acids Res*  
773 gkaa500-.

774 Dasgupta S, Masukata H, Tomizawa J. 1987. Multiple mechanisms for initiation of  
775 ColE1 DNA replication: DNA synthesis in the presence and absence of ribonuclease H.  
776 *Cell* 51: 1113–1122.

777 DeLuca SZ, Spradling AC. 2018. Efficient Expression of Genes in the *Drosophila*  
778 Germline Using a UAS-Promoter Free of Interference by Hsp70 piRNAs. *Genetics* 209:  
779 381–387.

780 Dumelie JG, Jaffrey SR. 2017. Defining the location of promoter-associated R-loops at  
781 near-nucleotide resolution using bisDRIP-seq. *Elife* 6: e28306.

782 Fang Y, Chen L, Lin K, Feng Y, Zhang P, Pan X, Sanders J, Wu Y, Wang X, Su Z, et al.  
783 2019. Characterization of functional relationships of R-loops with gene transcription and  
784 epigenetic modifications in rice. *Genome Res* 29: 1287–1297.

785 Farrell JA, O’Farrell PH. 2014. From Egg to Gastrula: How the Cell Cycle Is Remodeled  
786 During the *Drosophila* Mid-Blastula Transition. *Annu Rev Genet* 48: 1–26.

787 Foe VE, Alberts BM. 1983. Studies of nuclear and cytoplasmic behaviour during the five  
788 mitotic cycles that precede gastrulation in *Drosophila* embryogenesis. *J Cell Sci* 61: 31–  
789 70.

790 Ginno PA, Lott PL, Christensen HC, Korf I, Chédin F. 2012. R-Loop Formation Is a  
791 Distinctive Characteristic of Unmethylated Human CpG Island Promoters. *Mol Cell* 45:  
792 814–825.

793 Glover DM, Hogness DS. 1977. A novel arrangement of the 18S and 28S sequences in  
794 a repeating unit of *drosophila melanogaster* rDNA. *Cell* 10: 167–176.

795 Hage AE, French SL, Beyer AL, Tollervey D. 2010. Loss of Topoisomerase I leads to R-  
796 loop-mediated transcriptional blocks during ribosomal RNA synthesis. *Genes &*  
797 *Development* 24: 1546–1558.

798 Hamm DC, Harrison MM. 2018. Regulatory principles governing the maternal-to-zygotic  
799 transition: insights from *Drosophila melanogaster*. *Royal Soc Open Biology* 8: 180183.

800 Hamperl S, Bocek MJ, Saldivar JC, Swigut T, Cimprich KA. 2017. Transcription-  
801 Replication Conflict Orientation Modulates R-Loop Levels and Activates Distinct DNA  
802 Damage Responses. *Cell* 170: 774–774.e19.

803 Harrison MM, Li X-Y, Kaplan T, Botchan MR, Eisen MB. 2011. Zelda Binding in the  
804 Early *Drosophila melanogaster* Embryo Marks Regions Subsequently Activated at the  
805 Maternal-to-Zygotic Transition. *PLoS Genetics* 7: e1002266.

806 Hartono SR, Malapert A, Legros P, Bernard P, Chédin F, Vanoosthuyse V. 2018. The  
807 Affinity of the S9.6 Antibody for Double-Stranded RNAs Impacts the Accurate Mapping  
808 of R-Loops in Fission Yeast. *J Mol Biol* 430: 272–284.

809 Heinz S, Benner C, Spann N, Bertolino E, Lin YC, Laslo P, Cheng JX, Murre C, Singh  
810 H, Glass CK. 2010. Simple Combinations of Lineage-Determining Transcription Factors  
811 Prime cis-Regulatory Elements Required for Macrophage and B Cell Identities. *Mol Cell*  
812 38: 576–589.

813 Herrera-Moyano E, Mergui X, García-Rubio ML, Barroso S, Aguilera A. 2014. The yeast  
814 and human FACT chromatin-reorganizing complexes solve R-loop-mediated  
815 transcription–replication conflicts. *Genes & Development* 28: 735–748.

816 Huppert JL. 2008. Thermodynamic prediction of RNA–DNA duplex-forming regions in  
817 the human genome. *Mol Biosyst* 4: 686–691.

818 Lang KS, Hall AN, Merrih CN, Ragheb M, Tabakh H, Pollock AJ, Woodward JJ,  
819 Dreifus JE, Merrih H. 2017. Replication-Transcription Conflicts Generate R-Loops that  
820 Orchestrate Bacterial Stress Survival and Pathogenesis. *Cell* 170: 787–799.e18.

821 Langmead B, Salzberg SL. 2012. Fast gapped-read alignment with Bowtie 2. *Nat*  
822 *Methods* 9: 357–359.

823 Lee C-Y, McNerney C, Ma K, Zhao W, Wang A, Myong S. 2020. R-loop induced G-  
824 quadruplex in non-template promotes transcription by successive R-loop formation. *Nat*  
825 *Commun* 11: 3392.

826 Li H, Handsaker B, Wysoker A, Fennell T, Ruan J, Homer N, Marth G, Abecasis G,  
827 Durbin R, Subgroup 1000 Genome Project Data Processing. 2009. The Sequence  
828 Alignment/Map format and SAMtools. *Bioinformatics* 25: 2078–2079.

829 Lima WF, Murray HM, Damle SS, Hart CE, Hung G, De Hoyos CL, Liang X-H, Crooke  
830 ST. 2016. Viable RNaseH1 knockout mice show RNaseH1 is essential for R loop  
831 processing, mitochondrial and liver function. *Nucleic Acids Res* 44: 5299–5312.



- 832 Liu Y, Liu Q, Su H, Liu K, Xiao X, Li W, Sun Q, Birchler JA, Han F. 2021. Genome-wide  
833 mapping reveals R-loops associated with centromeric repeats in maize. *Genome Res*  
834 **31**: 1409–1418.
- 835 McLean MJ, Wolfe KH, Devine KM. 1998. Base Composition Skews, Replication  
836 Orientation, and Gene Orientation in 12 Prokaryote Genomes. *J Mol Evol* 47: 691–696.
- 837 Nguyen HD, Yadav T, Giri S, Saez B, Graubert TA, Zou L. 2017. Functions of  
838 Replication Protein A as a Sensor of R Loops and a Regulator of RNaseH1. *Mol Cell*  
839 **65**: 832-847.e4.
- 840 Ouyang J, Yadav T, Zhang J-M, Yang H, Rheinbay E, Guo H, Haber DA, Lan L, Zou L.  
841 2021. RNA transcripts stimulate homologous recombination by forming DR-loops.  
842 *Nature* 1–6.
- 843 Pinter S, Knodel F, Choudalakis M, Schnee P, Kroll C, Fuchs M, Broehm A, Weirich S,  
844 Roth M, Eisler SA, et al. 2021. A functional LSD1 coregulator screen reveals a novel  
845 transcriptional regulatory cascade connecting R-loop homeostasis with epigenetic  
846 regulation. *Nucleic Acids Res* 49: gkab180-.
- 847 Quinlan AR, Hall IM. 2010. BEDTools: a flexible suite of utilities for comparing genomic  
848 features. *Bioinformatics* 26: 841–842.
- 849 Ramírez F, Dündar F, Diehl S, Grüning BA, Manke T. 2014. deepTools: a flexible  
850 platform for exploring deep-sequencing data. *Nucleic Acids Res* 42: W187–W191.
- 851 Ramirez P, Crouch RJ, Cheung VG, Grunseich C. 2021. R-Loop Analysis by Dot-Blot. *J*  
852 *Vis Exp*.
- 853 Rørth P. 1998. Gal4 in the *Drosophila* female germline. *Mech Develop* 78: 113–118.

854 Sanz LA, Hartono SR, Lim YW, Steyaert S, Rajpurkar A, Ginno PA, Xu X, Chédin F.  
855 2016. Prevalent, Dynamic, and Conserved R-Loop Structures Associate with Specific  
856 Epigenomic Signatures in Mammals. *Mol Cell* 63: 167–178.

857 Saunders A, Core LJ, Sutcliffe C, Lis JT, Ashe HL. 2013. Extensive polymerase pausing  
858 during *Drosophila* axis patterning enables high-level and pliable transcription. *Gene Dev*  
859 27: 1146–1158.

860 Schneider CA, Rasband WS, Eliceiri KW. 2012. NIH Image to ImageJ: 25 years of  
861 image analysis. *Nat Methods* 9: 671–675.

862 Schneider I. 1972. Cell lines derived from late embryonic stages of *Drosophila*  
863 melanogaster. *J Embryol Exp Morph* 27: 353–65.

864 Shafiq S, Chen C, Yang J, Cheng L, Ma F, Widemann E, Sun Q. 2017. DNA  
865 Topoisomerase 1 Prevents R-loop Accumulation to Modulate Auxin-Regulated Root  
866 Development in Rice. *Mol Plant* 10: 821–833.

867 Sibon OCM, Laurençon A, Hawley RS, Theurkauf WE. 1999. The *Drosophila* ATM  
868 homologue Mei-41 has an essential checkpoint function at the midblastula transition.  
869 *Curr Biol* 9: 302–312.

870 Silva S, Camino LP, Aguilera A. 2018. Human mitochondrial degradosome prevents  
871 harmful mitochondrial R loops and mitochondrial genome instability. *Proc National Acad*  
872 *Sci* 115: 201807258.

873 Skourti-Stathaki K, Kamieniarz-Gdula K, Proudfoot NJ. 2014. R-loops induce repressive  
874 chromatin marks over mammalian gene terminators. *Nature* 516: 436.

875 Skourti-Stathaki K, Proudfoot NJ. 2014. A double-edged sword: R loops as threats to  
876 genome integrity and powerful regulators of gene expression. *Genes & Development*  
877 28: 1384–1396.

878 Skourti-Stathaki K, Triglia ET, Warburton M, Voigt P, Bird A, Pombo A. 2019. R-Loops  
879 Enhance Polycomb Repression at a Subset of Developmental Regulator Genes. *Mol*  
880 *Cell* 73: 930–945.e4.

881 Smith AV, Orr-Weaver TL. 1991. The regulation of the cell cycle during *Drosophila*  
882 embryogenesis: the transition to polyteny. *Dev Camb Engl* 112: 997–1008.

883 Stolz R, Sulthana S, Hartono SR, Malig M, Benham CJ, Chedin F. 2019. Interplay  
884 between DNA sequence and negative superhelicity drives R-loop structures. *Proc*  
885 *National Acad Sci* 116: 201819476.

886 Stork CT, Bocek M, Crossley MP, Sollier J, Sanz LA, Chédin F, Swigut T, Cimprich KA.  
887 2016. Co-transcriptional R-loops are the main cause of estrogen-induced DNA damage.  
888 *eLife* 5.

889 Sun Q, Csorba T, Skourti-Stathaki K, Proudfoot NJ, Dean C. 2013. R-Loop Stabilization  
890 Represses Antisense Transcription at the *Arabidopsis FLC* Locus. *Science* 340: 619–  
891 21.

892 Tadros W, Lipshitz HD. 2009. The maternal-to-zygotic transition: a play in two acts.  
893 *Development* 136: 3033–3042.

894 Tan-Wong SM, Dhir S, Proudfoot NJ. 2019. R-Loops Promote Antisense Transcription  
895 across the Mammalian Genome. *Mol Cell* 76: 600–616.e6.

- 896 Wahba L, Costantino L, Tan FJ, Zimmer A, Koshland D. 2016. S1-DRIP-seq identifies  
897 high expression and polyA tracts as major contributors to R-loop formation. *Gene Dev*  
898 30: 1327–1338.
- 899 White RL, Hogness DS. 1977. R loop mapping of the 18S and 28S sequences in the  
900 long and short repeating units of drosophila melanogaster rDNA. *Cell* 10: 177–192.
- 901 Xu W, Li K, Li S, Hou Q, Zhang Y, Liu K, Sun Q. 2020. The R-loop Atlas of Arabidopsis  
902 Development and Responses to Environmental Stimuli. *Plant Cell* tpc.00802.2019.
- 903 Xu W, Xu H, Li K, Fan Y, Liu Y, Yang X, Sun Q. 2017. The R-loop is a common  
904 chromatin feature of the Arabidopsis genome. *Nat Plants* 3: 704–714.
- 905 Yan P, Liu Z, Song M, Wu Z, Xu W, Li K, Ji Q, Wang S, Liu X, Yan K, et al. 2020.  
906 Genome-wide R-loop Landscapes during Cell Differentiation and Reprogramming. *Cell*  
907 Reports 32: 107870.
- 908 Zeller P, Padeken J, Schendel R van, Kalck V, Tijsterman M, Gasser SM. 2016. Histone  
909 H3K9 methylation is dispensable for *Caenorhabditis elegans* development but  
910 suppresses RNA:DNA hybrid-associated repeat instability. *Nat Genet* 48: 1385–1395.
- 911 Zeng C, Onoguchi M, Hamada M. 2021. Association analysis of repetitive elements and  
912 R-loop formation across species. *Mobile Dna-uk* 12: 3.
- 913 Zhang Y, Liu T, Meyer CA, Eeckhoute J, Johnson DS, Bernstein BE, Nusbaum C,  
914 Myers RM, Brown M, Li W, et al. 2008. Model-based Analysis of ChIP-Seq (MACS).  
915 *Genome Biol* 9: R137–R137.
